# Supplementary material
Source: publisher figshare collection journal article supplement (https://karger.figshare.com/articles/dataset/_/5123323)
Supplement: Supplementary file 1 [file 1]

Archive with 7 entries (7 files):
- 000336675_sm_Figure.pdf
- 000336675_sm_Legende.doc
- 000336675_sm_Methods.doc
- 000336675_sm_Methods.pdf
- 000336675_sm_Table1.doc
- 000336675_sm_Table2.doc
- 000336675_sm_Tables.pdf
