# Supplementary material
Source: publisher figshare collection journal article supplement (https://karger.figshare.com/articles/dataset/_/5123323)
Supplement: Supplementary file 1 [file 1 › 000336675_sm_Figure.pdf]

## ALOX5

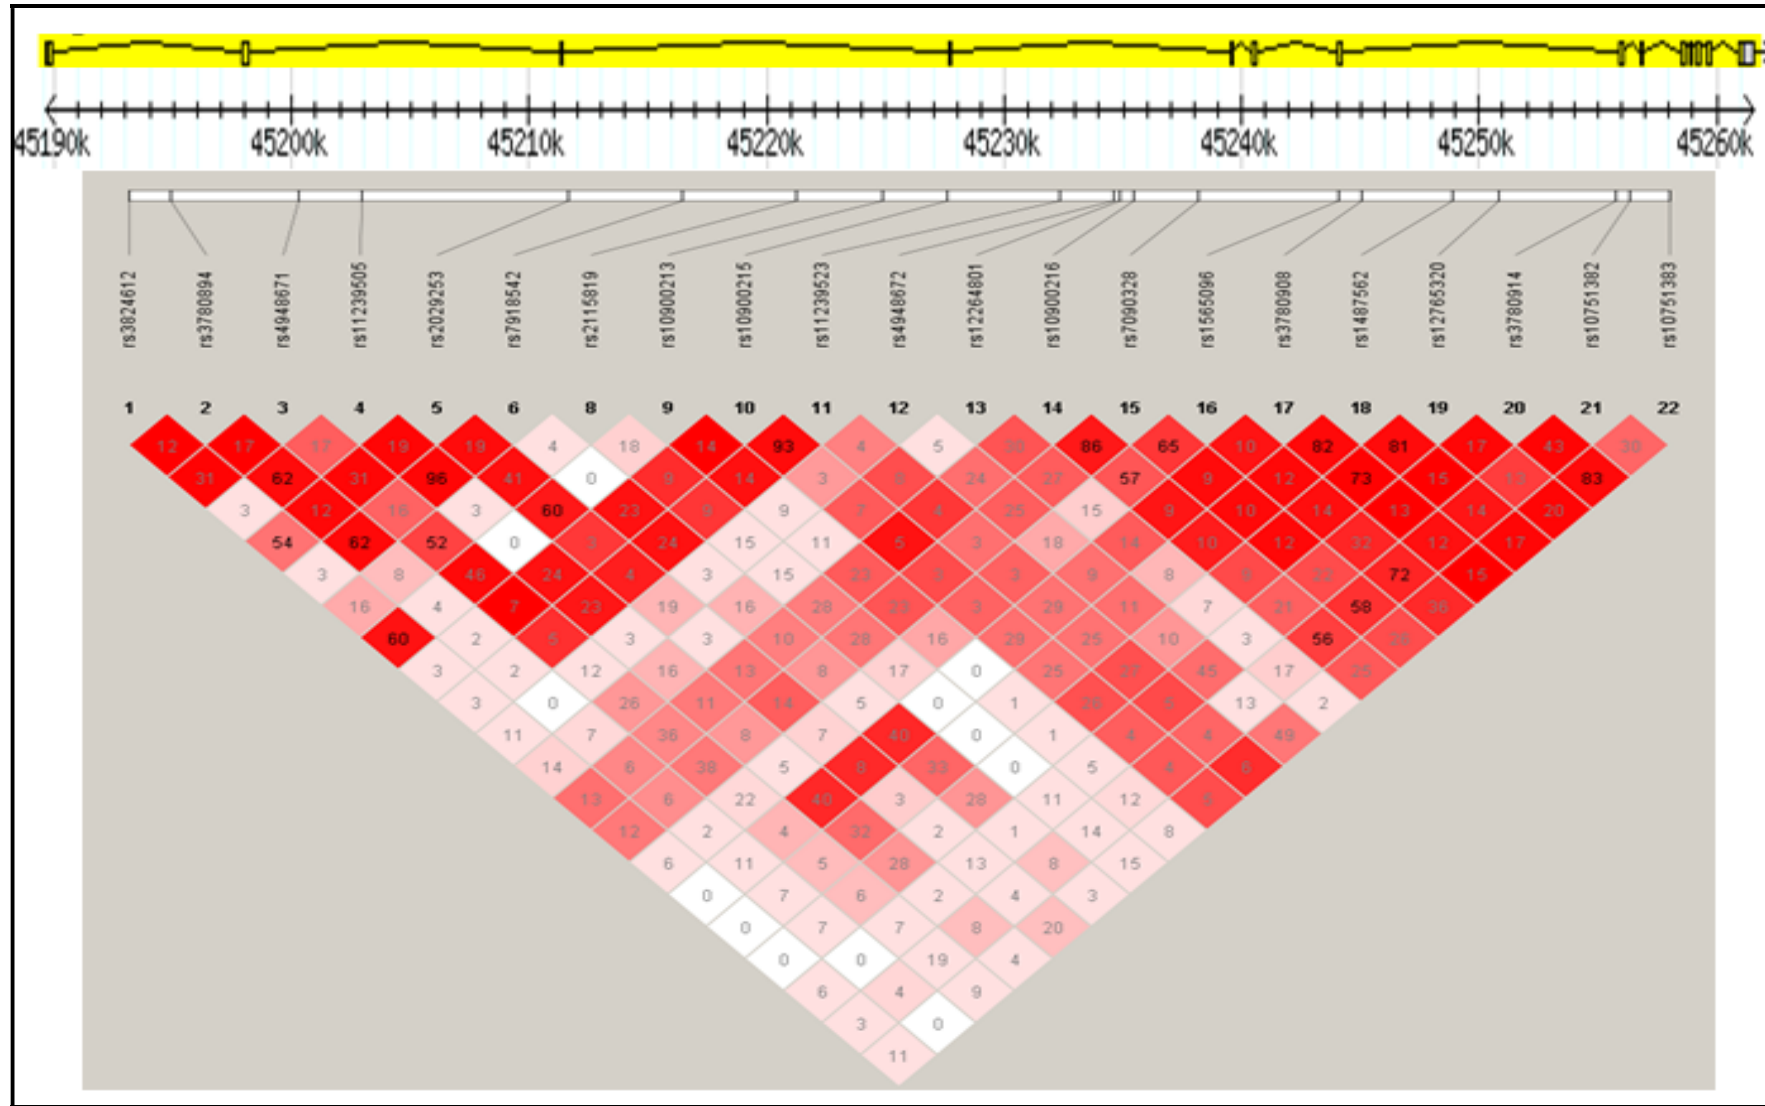

**Supplementary Figure 1: Pair-wise linkage disequilibrium (LD) among the SNPs in *ALOX5*.** The values in the boxes are Pearson's correlation ( $r^2$ ) values. The LD plots have been constructed using Haploview (version 4.2) as described in Materials and Methods. At the top of each box is the structure of gene.
