# Supplementary material
Source: publisher figshare collection journal article supplement (https://karger.figshare.com/articles/dataset/_/5123323)
Supplement: Supplementary file 1 [file 1 › 000336675_sm_Methods.pdf]

## Supplementary Methods

### Subjects

In the present study, asthmatic patients ( $n=147$ ,  $38.5 \pm 15$  years) and normal controls ( $n=199$ ,  $37.0 \pm 13.5$  years) were recruited from our collaborating centers following clinician's diagnosed asthma and a set of inclusion/exclusion criterion (**Supplementary Table 1**), after obtaining ethical clearance from our institute and the participating centers. Written consents were obtained from individuals for participating in the study, performing SPT (skin prick test) and obtaining blood samples. A standard questionnaire was filled by the candidates giving clinical details, migration status, environmental history, family history of diseases etc. The clinical test used for ascertaining asthma phenotypes were pulmonary function test (PFT) [ $FEV_1$ , bronchial reversibility ( $>15\%$ ) test using  $\beta_2$ -agonist inhaler (albuterol/salbutamol)], skin prick test (wheal reaction  $>3\text{mm}$  diameter) to a panel of 15 local environmental allergens and total serum IgE estimation as described earlier. Only individuals with self reported history of breathlessness and wheezing with positive family history were included in the study. Normal controls were recruited from general population taking details of migration status, ethnicity and no self reported history of asthma or allergic diseases. All individuals with smoking history and parasitic/helminthic infections in the past were excluded from the study. For the family based association studies 247 families were collected as ascertained through probands ( $15.6 \pm 11.2$  years) who were asthmatics along with both the parents affected/unaffected. Families were further extended wherever consents were obtained and a total of 1022 individuals were thus recruited with average family size of 3.94 (range from 3 to 12 members). The disease status was confirmed in a manner similar

to case-control study. The genetic homogeneity between patients and controls was confirmed by genotyping loci as yet unknown to be associated with asthma as described previously [E1].

### **Genotyping and data cleaning**

DNA was isolated from peripheral white blood cells using the modified salting out method<sup>E1</sup> and was stored at -20°C until further analysis. For *LTC4S* gene, PCR amplifications were done using primers and conditions as listed (**Supplementary Table 2**). Following successful PCR amplification, the rs3776944 and rs730012 SNPs were queried using SNaPShot ddNTP Primer Extension Kit (ABI) and primers and conditions as mentioned in (**Supplementary Table 2**). 1U of calf intestinal phosphatase (CIP) (New England Biolabs, Beverly, MA) was used to clean up the primer extension reaction. These samples were subsequently electrophoresed using the ABI Prism 3100 Genetic Analyzer as per the manufacturer's instructions. The results were analyzed using the program ABI Prism GeneMapper v3.7 (Applied Biosystems, Foster City, USA).

Polymorphisms in *ALOX5* and *CysLTR2* were genotyped using Illumina's Golden Gate Assay (Illumina Inc.) in accordance with manufacturer's protocol [E2]. Briefly, the OPA, querying a set of SNPs, is hybridized simultaneously to genomic DNA followed by allele specific primer extension and ligation. Subsequently, a set of fluorescently labeled universal primers (Cy3 and Cy5 labeled P1 and P2 respectively) were added and PCR was carried out, generating multiple labeled amplicons representing hundreds of different SNPs. These fluorescent products were then combined with beads on the Sentrix Array Matrix (SAM). The address sequences within the PCR amplicons hybridize to their related sequences on the beads, and the fluorescence on each bead is quantified resulting in a signal associated with a particular

address sequence. Each bead type is represented approximately 25 times on the array to improve the accuracy of the signal. After hybridization, the SAM was scanned using Beadstation 500 - Beadarray reader. The hybridization intensities from Beadarray reader were used for data processing, clustering and genotype calling using the genotyping module in the BeadStudio package v3. GenCall module of BeadStudio was used to generate genotype calls. The genotype clusters generated for each SNP locus by GenCall were edited manually after visual inspection of clusters on two-dimensional plot. All the genotype clusters were inspected and corrected manually; the threshold for GenTrain score of  $> 0.25$  was set to call a SNP successfully genotyped [E2].

We retained markers for further analysis if the call rate was above 90%, maximum of one reproducibility error, maximum of five Mendelian errors and showed consistency with HWE at the level of  $P > 0.001$ .

### **Data/statistical analysis**

Hardy-Weinberg equilibrium (HWE) for patients as well as controls was calculated using PLINK (<http://pngu.mgh.harvard.edu/~purcell/plink/>) [E3]. Pair-wise LD among the SNPs in the cases and control population was measured by complementary measures, Lewtonin's standardized LD coefficient ( $D'$ ) and Pearson's correlation ( $r^2$ ) by using the software Haploview v 4.2 [E4]. Tag SNP selection was done using tagger as implemented in Haploview setting a threshold of  $r^2 \geq 0.8$ .

Case-control association analysis was performed for each polymorphism, using the Armitage trend test using PLINK [E3]. Odds ratios (OR) were also calculated using  $2 \times 2$  contingency tables (<http://home.clara.net/sisa/>). Associations between serum IgE levels and

alleles of markers were analyzed in cases and controls using PLINK [E3]. Logistic regression analysis was performed to evaluate the effect of age and sex, if any, on the association of various genotypes on asthma or serum total IgE levels.

For the family based analysis (with binary trait asthma and  $\log_{10}$  serum IgE levels), FBAT (Family Based Association Test) was used (<http://www.biostat.harvard.edu/~fbat>) since this method has several reported advantages and best suited for heterogeneous family structures [E5, E6]. We have also used TDT (transmission disequilibrium test) as implemented in PLINK [E3] (plink --tdt option) as a tool to validate observations made from FBAT analysis.

Haplotypic association analyses were performed using PLINK [E3] and HBAT (implemented in FBAT) [E5, E6]. PLINK uses standard Expectation-Maximization (E-M) algorithm to estimate haplotypes and then performs standard family based and population based (unrelated individuals) association testing. Since we have genotyped a number of markers in *ALOX5*, to avoid large number of haplotypes with frequency less than 0.05, we have used sliding window haplotypic association analysis [E7] (in case-control cohort) with window size of 5.

In families haplotype based TDT association test were performed using PLINK [E3] (plink --file mydata --hap myfile.hlist --hap-tdt) for regions (marker combination) identified as regions of highest significance in the case-control analysis. Furthermore, excessive transmissions of the multi-locus haplotypes were also tested using the HBAT as implemented in FBAT package [E5, E6], using the additive model with bi-allelic (individual haplotype based) and multi-allelic (global test of association) models. We also used the Monte Carlo permutation approach as implemented in FBAT (hbat --p option) to validate our observations.

## **Combining p values**

We have performed family based and case-control studies (single gene or gene-wise analysis), where independent set of samples have been used i.e. individuals in families and case-control cohorts are non-overlapping. However, these are samples drawn from the same population. In each of the analyses (family based and case-control) p values have been obtained for all the association tests that we performed using appropriate methods for different types of samples. We used the Fisher's method or Fisher's combined probability test [E8] for combining the p values obtained from family based and case-control association analysis. Fisher's combined probability test is a technique for data fusion or meta-analysis [E8]. In its basic form, it is used to combine the results from several independent tests. Combining p-values from different tests, where same hypothesis is under testing, is an important method and has been suggested to provide higher strength towards decision-making [E9] as it is based on more information from both types of samples considered here. It is to be noted that only p values obtained in allelic association analysis have been combined since this was the screening step for identifying statistically significant associations.

## **Correction for multiple testing**

We have performed Bonferroni corrections for multiple testing. For the single gene analysis a total of 19 SNPs were included in association analysis and therefore the SNPs showing a combined p value of 0.0026 were considered to be significantly associated with asthma or total serum IgE. In contrast, for previously reported asthma (or related phenotypes) associated polymorphisms (different study/population), we have relied on raw p values (non-

corrected/combined p values), since there is prior evidence of negating null hypothesis ( $H_0$ ), and replication of the effect in a new population is being tested.

## References

- E1 Kumar A, Ghosh B. A single nucleotide polymorphism (A --> G) in intron 3 of IFN-gamma gene is associated with asthma. *Genes Immun* 2008; 9 (4): 294-301.
- E2 Fan JB, Gunderson KL, Bibikova M, Yeakley JM, Chen J, Wickham Garcia E, Lebruska LL, Laurent M, Shen R, Barker D . Illumina universal bead arrays. *Methods Enzymol* 2006; 410: 57-73.
- E3 Purcell S, Neale B, Todd-Brown K, Thomas L, Ferreira MA, Bender D, Maller J, Sklar P, de Bakker PI, Daly MJ, Sham PC. PLINK: a tool set for whole-genome association and population-based linkage analyses. *Am J Hum Genet* 2007; 81 (3): 559-75.
- E4 Barrett JC, Fry B, Maller J, Daly MJ. Haploview: analysis and visualization of LD and haplotype maps. *Bioinformatics* 2005; 21(2): 263-5.
- E5 Laird NM, Horvath S, Xu X . Implementing a unified approach to family-based tests of association. *Genet Epidemiol* 2000; 19 Suppl 1: S36-42.
- E6 Rabinowitz D, Laird N . A unified approach to adjusting association tests for population admixture with arbitrary pedigree structure and arbitrary missing marker information. *Hum Hered* 2000; 50 (4): 211-23.
- E7 Li Y, Sung WK, Liu JJ. Association mapping via regularized regression analysis of single-nucleotide-polymorphism haplotypes in variable-sized sliding windows. *Am J Hum Genet* 2007; 80 (4): 705-15.
- E8 Fisher RA (1932). *Statistical Methods for Research Workers*. 4. London: Oliver and Boyd.
- E9 Lasky-Su J, Won S, Mick E, Anney RJ, Franke B, Neale B, Biederman J, Smalley SL, Loo SK, Todorov A, Faraone SV, Weiss ST, Lange C. On genome-wide association studies for family-based designs: an integrative analysis approach combining ascertained family samples with unselected controls. *Am J Hum Genet* 2010; 86(4): 573-80.
