# Supplementary material
Source: publisher figshare collection journal article supplement (https://karger.figshare.com/articles/dataset/_/5123323)
Supplement: Supplementary file 1 [file 1 › 000336675_sm_Tables.pdf]

**Supplementary Table 1: The inclusion and exclusion criteria for the recruitment of asthma patients and families**

|                                                                                                                                                                                                                                                                                                                                                                                                                                                                                                                                                                                                                                                                                                                                                                                                                                                                                                                                                                                          |
|------------------------------------------------------------------------------------------------------------------------------------------------------------------------------------------------------------------------------------------------------------------------------------------------------------------------------------------------------------------------------------------------------------------------------------------------------------------------------------------------------------------------------------------------------------------------------------------------------------------------------------------------------------------------------------------------------------------------------------------------------------------------------------------------------------------------------------------------------------------------------------------------------------------------------------------------------------------------------------------|
| <p><b>Inclusion criteria:</b></p> <ul style="list-style-type: none"><li>➤ Patients of six to thirty five years of age with recurrent symptoms of cough with expectoration,</li><li>➤ Clinical improvement with inhaled steroids,</li><li>➤ Reversibility of the bronchial obstruction after administration of <math>\beta</math>2-agonists (an increase in FEV1 greater than 15)</li><li>➤ Absolute eosinophil count &gt; 500/cubic mm,</li><li>➤ Total serum IgE&gt;250IU/ml,</li><li>➤ Positive skin-prick test (SPT) to common allergens (<b>Table 1</b>) in the study area,</li><li>➤ Positive family history of asthma as per questionnaire and verified by clinicians.</li></ul> <p><b>Exclusion criteria:</b></p> <ul style="list-style-type: none"><li>➤ Patients with smoking history,</li><li>➤ Pregnancy,</li><li>➤ Parasitic infestations,</li><li>➤ Patients with other possible causes of eosinophilia such as drugs, tropical pulmonary eosinophilia (TPE) etc.</li></ul> |
|------------------------------------------------------------------------------------------------------------------------------------------------------------------------------------------------------------------------------------------------------------------------------------------------------------------------------------------------------------------------------------------------------------------------------------------------------------------------------------------------------------------------------------------------------------------------------------------------------------------------------------------------------------------------------------------------------------------------------------------------------------------------------------------------------------------------------------------------------------------------------------------------------------------------------------------------------------------------------------------|

**All participants were required to sign informed consent form as approved by ethical committee at IGIB and the participating medical colleges/hospitals.**

**Supplementary Table 2: Details of Primers used for genotyping *LTC4S* polymorphisms**

| Primer Name       | Primer Sequence                     | Annealing Temperature<br>°C (T <sub>m</sub> ) | Product size | Fragment/Polymorphism |
|-------------------|-------------------------------------|-----------------------------------------------|--------------|-----------------------|
| LTC4S_rs3776944FP | 5' GCC ACC GCA AAC CCA CTC AA 3'    | 67-62*                                        | 385          | rs3776944             |
| LTC4S_rs3776944RP | 5' GCT GCC CTC CCC ACA CTC 3'       | 67-62*                                        | 385          | rs3776944             |
| LTC4S_rs730012FP  | 5' AAG GAG AAA GAG CTT GTG GG 3'    | 57                                            | 161          | rs730012              |
| LTC4S_rs730012RP  | 5' ACT CCT CCA CCC ACC TTA TC 3'    | 57                                            | 161          | rs730012              |
| LTC4S_rs3776944SS | 5' CTG GAG TTC TGG GTG TCT CCC T 3' | 55                                            | 23           | SNaPShot Primer       |
| LTC4S_rs730012SS  | 5' ACA GCC TGG ATG GGG AC           | 55                                            | 18           | SNaPShot Primer       |

**Abbreviations:** **FP**:-Forward primer; **RP**:-Reverse primer; **SS**:-Snapshot Primer

The last column represents the polymorphisms genotyped in the PCR amplified products.

SNaPShot Primers are primers designed one base before the polymorphic loci to be used for single base extension using SNaPShot ddNTP Primer Extension Kit (Applied Biosystems, Foster City, USA).

\* This is annealing temperature for touchdown PCR. For the initial 10 cycles annealing temperature falls @-0.5°C to 62°C. subsequently 25 cycles of cycling reactions are performed with annealing temperature 62°C.

The PCR thermo-cycling conditions, generally involved an initial denaturation step at 94°C for 10 min, followed by 35 cycles of 30 sec denaturation at 94°C, 30 sec annealing at primer-pair specific temperature (T<sub>m</sub>), extension at 72°C for 1 min per kb of the amplicon; followed by a final extension at 72°C for 10 min.

(Note:-The region containing the rs28365149 could not be PCR amplified using multiple primer sets (not shown))
